# Supplementary material
Source: PubMed Central journal article supplement (PMC524066)

# P18-I10 specific CD8 CTL from animals immunized with

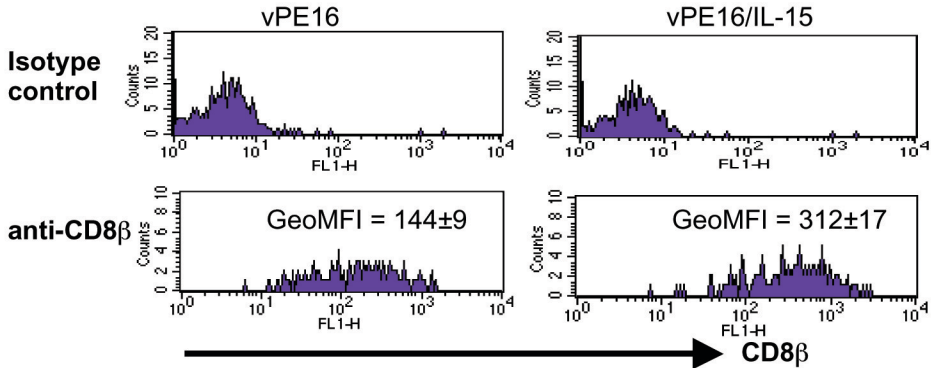

Supplement: pnas_101_42_15154__10.pdf [file pnas_101_42_15154__10.pdf]

WT

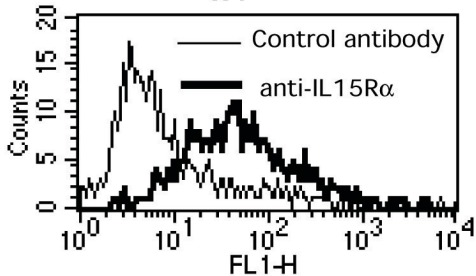

IL-15R $\alpha$  (-/-)

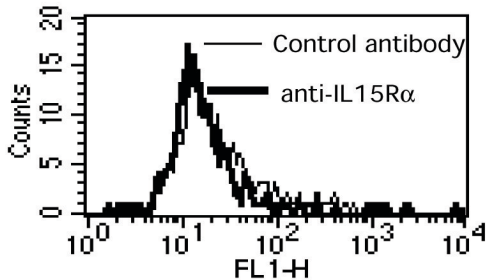

Supplement: pnas_101_42_15154__6.pdf [file pnas_101_42_15154__6.pdf]

# P18-I10 specific CTL induced by

vPE16

vPE16/IL-15

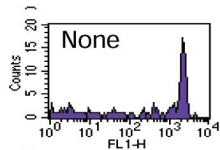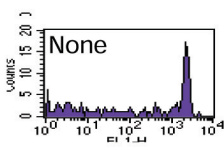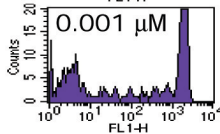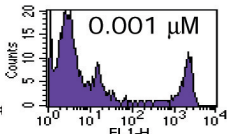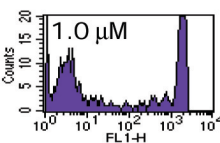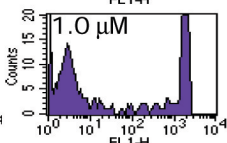

➔ CFSE

Supplement: pnas_101_42_15154__7.pdf [file pnas_101_42_15154__7.pdf]

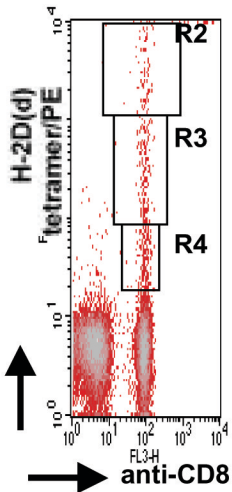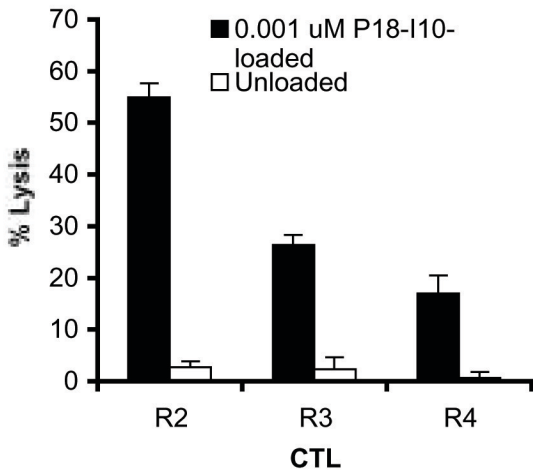

Supplement: pnas_101_42_15154__8.pdf [file pnas_101_42_15154__8.pdf]

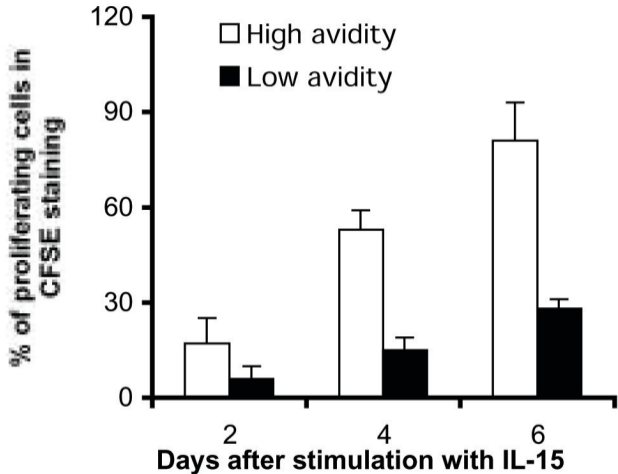

Supplement: pnas_101_42_15154__9.pdf [file pnas_101_42_15154__9.pdf]
